# Supplementary material for: Bioactives and Technological Quality of Functional Biscuits Containing Flour and Liquid Extracts from Broccoli By-Products
Source: MDPI journal article supplement (doi:10.3390/antiox12122115), 2023-12-14
Supplement: s1 [file s1]

**Table S1.** Hardening rate and apparent biaxial extensional viscosity (ABEV) values of control and functional doughs.

|           | Hardening Rate<br>(kPa·s <sup>2</sup> ) | Max ABEV<br>(kPa·s)  |
|-----------|-----------------------------------------|----------------------|
| D_CTRL    | 1.7 E-04 <sup>a</sup>                   | 721.28 <sup>A</sup>  |
| D_100W    | 1.8 E-04 <sup>b</sup>                   | 657.86 <sup>B</sup>  |
| D_75W25ET | 1.7 E-04 <sup>a</sup>                   | 813.70 <sup>C</sup>  |
| D_50W50ET | 1.1 E-04 <sup>c</sup>                   | 987.43 <sup>D</sup>  |
| D_BF10    | 5.1 E-05 <sup>d</sup>                   | 2395.63 <sup>E</sup> |

D: dough; CTRL: control; W: water; ET: ethanol; BF10: 10% broccoli flour. Values represent average values. Different letters indicate significant differences with  $p < 0.05$ .

**Table S2.** Texture profile analysis. Values are reported as average  $\pm$  standard error.

|                       | B_CTRL          | B_100W          | B_75W25ET       | B_50W50ET       | B_BF10          |
|-----------------------|-----------------|-----------------|-----------------|-----------------|-----------------|
| Cohesivity [A2/A1]    | 3.58 $\pm$ 0.18 | 3.63 $\pm$ 0.15 | 3.69 $\pm$ 0.21 | 3.59 $\pm$ 0.17 | 3.22 $\pm$ 0.41 |
| Springiness [D2/D1]   | 2.00 $\pm$ 0.02 | 2.01 $\pm$ 0.00 | 2.01 $\pm$ 0.00 | 2.00 $\pm$ 0.00 | 1.81 $\pm$ 0.06 |
| Gumminess [HxC]       | 1192 $\pm$ 85.7 | 1083 $\pm$ 52.1 | 885 $\pm$ 85.5  | 1107 $\pm$ 98.6 | 1604 $\pm$ 90.1 |
| Chewiness [HxCxS]     | 2385 $\pm$ 173  | 2180 $\pm$ 106  | 1781 $\pm$ 172  | 2216 $\pm$ 197  | 2941 $\pm$ 250  |
| Resiliency [A4/A3]    | 0.07 $\pm$ 0.01 | 0.07 $\pm$ 0.00 | 0.06 $\pm$ 0.01 | 0.07 $\pm$ 0.01 | 0.15 $\pm$ 0.00 |
| Fragility [1st peak]  | 0.06 $\pm$ 0.01 | 0.05 $\pm$ 0.01 | 0.05 $\pm$ 0.01 | 0.05 $\pm$ 0.01 | 0.1 $\pm$ 0.03  |
| Friability[all peaks] | 197 $\pm$ 3.33  | 190 $\pm$ 6.60  | 178 $\pm$ 4.85  | 190 $\pm$ 3.31  | 180 $\pm$ 2.86  |
| Hardness[max peak]    | 333 $\pm$ 18.9  | 303 $\pm$ 19.2  | 242 $\pm$ 23.5  | 308 $\pm$ 20.8  | 539 $\pm$ 42.7  |

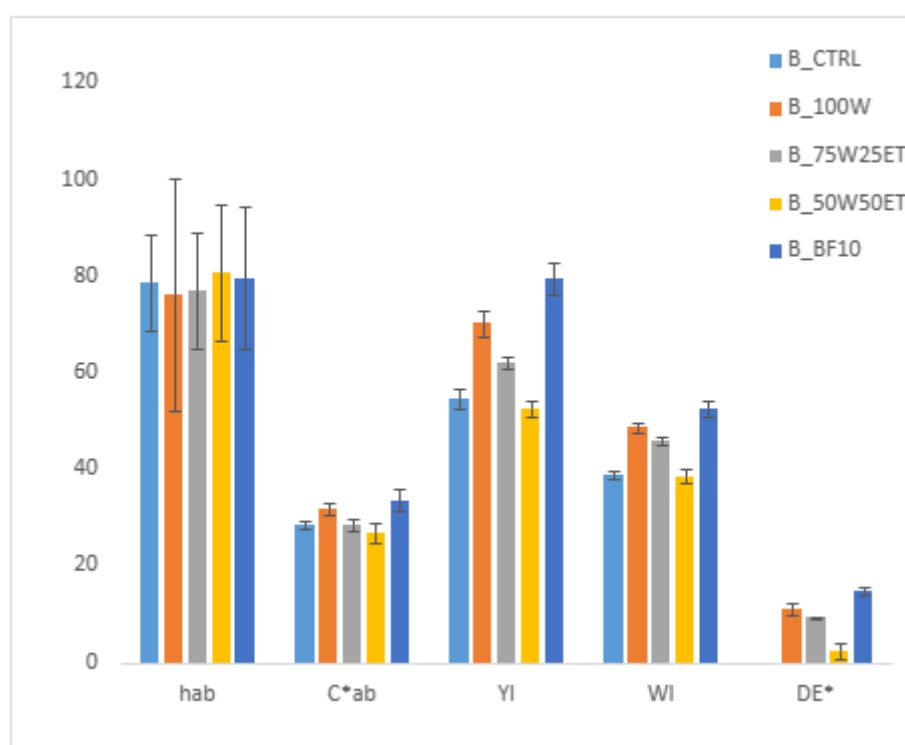

**Figure S 1.** Color attributes of control and functional biscuits prepared with broccoli-derived ingredients. Values are reported as average  $\pm$  standard error. The color attributes reported are: hab, hue angle; C\*ab, chroma; YI, yellowness index; WI, whiteness index;  $\Delta E^*$ , total color difference.

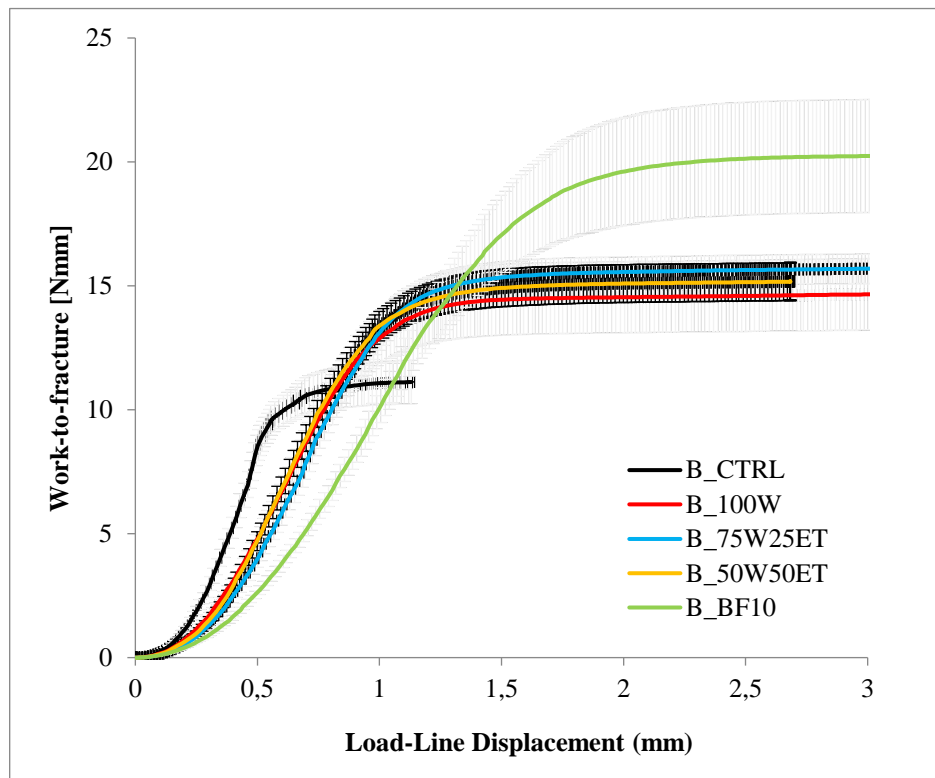

**Figure S 2.** Work to initiate and propagate a fracture in cookies under plain-strain conditions

**Table S3.** Work-to-initiate and work-to-propagate a fracture of control and functional biscuits.

|           | Work-to-Initiate<br>(Nmm) | Work-to-Propagate<br>(Nmm) |
|-----------|---------------------------|----------------------------|
| B_CTRL    | 7.03 <sup>a</sup>         | 0.100 <sup>a</sup>         |
| B_100W    | 8.07 <sup>c</sup>         | 0.110 <sup>b</sup>         |
| B_75W25ET | 7.85 <sup>b</sup>         | 0.121 <sup>c</sup>         |
| B_50W50ET | 8.38 <sup>d</sup>         | 0.131 <sup>d</sup>         |
| B_BF10    | 12.15 <sup>e</sup>        | 0.650 <sup>e</sup>         |

B: biscuit; CTRL: control; W: water; ET: ethanol; BF10: 10 % broccoli flour. Values represent average values. Different letters indicate significant differences with  $p < 0.05$ .
